# Supplementary material
Source: publisher figshare collection journal article supplement (https://sage.figshare.com/ndownloader/files/20080085)
Supplement: Supplementary file 1 [file 20080085]

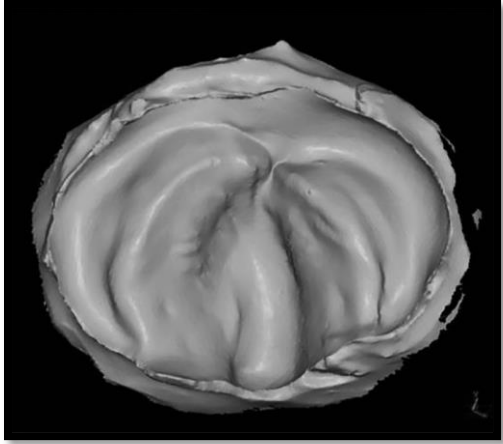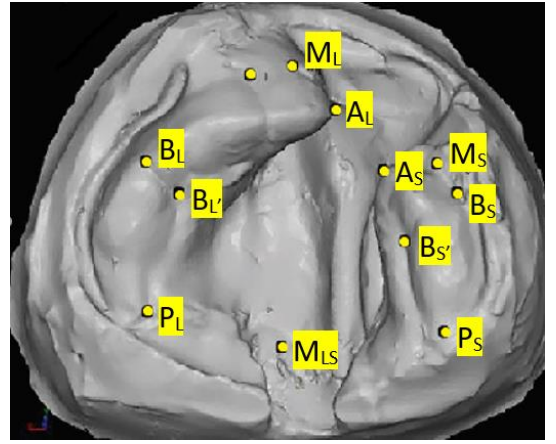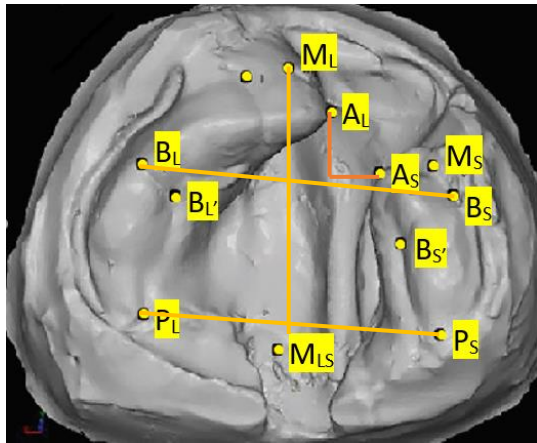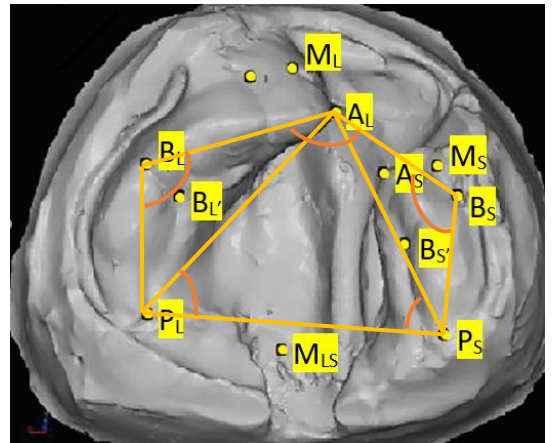

| Reference points to be marked on the 3D scanned models of cleft infants |                                                                                                                                      |
|-------------------------------------------------------------------------|--------------------------------------------------------------------------------------------------------------------------------------|
| Reference point Description                                             |                                                                                                                                      |
| PL                                                                      | The posterior-most point of the alveolar crest in the LS                                                                             |
| PS                                                                      | The posterior-most point of the alveolar crest in the SS                                                                             |
| AL                                                                      | The anterior-most point of the alveolar crest in the LS                                                                              |
| AS                                                                      | The anterior-most point of the alveolar crest in the SS                                                                              |
| BL'                                                                     | The intersection point between the palatally extended lateral sulcus line and the gingival groove in the LS                          |
| BS'                                                                     | The intersection point between the palatally extended lateral sulcus line and the gingival groove in the SS                          |
| BL                                                                      | The intersection point between the lateral sulcus line-BL line and the alveolar crest in the LS                                      |
| BS                                                                      | The intersection point between the lateral sulcus line-BS line and the alveolar crest in the SS                                      |
| ML                                                                      | The anterior-most point of the LS from PL-PS line                                                                                    |
| MS                                                                      | The anterior-most point of the SS from PL-PS line                                                                                    |
| MLS                                                                     | The midpoint of the PL-PS line                                                                                                       |
| I                                                                       | The intersection point between the line from labial frenum-incisive papilla point and the alveolar crest of the premaxilla in the LS |
| PL                                                                      | PS line the horizontal reference line                                                                                                |
| SL                                                                      | The perpendicular line to the PL-PS line. It crosses the midpoint (MLS) between PL in the LS and PS in the SS                        |
| LS                                                                      | Larger segment                                                                                                                       |
| SS                                                                      | Smaller segment                                                                                                                      |

#### Definitions of linear and angular parameters

##### Linear

PL-PS **Width between the posterior most point in between the larger and smaller segments**

BL-BS Width between the intersection points between the palatally extended lateral sulcus line and the gingival groove of the larger and smaller segments

Transverse AL-AS Transverse cleft gap between the anterior most points of the alveolar crest in the larger and smaller segments

Sagittal AL-AS Sagittal cleft gap between the anterior most points of the alveolar crest in the larger and smaller segments

AL-AS Linear cleft gap between the anterior most points of the alveolar crest in the larger and smaller segments

ML-(PL-PS) Length of the anterior most point in the larger segment when measured from the PL-PS line which is the horizontal reference line

MS-(PL-PS) Length of the anterior most point in the smaller segment when measured from the PL-PS line which is the horizontal reference line

#### Angular

(AL-PL)-(PL-PS) Angle between the line drawn from the anterior and posterior most point in the larger segment and the horizontal reference line

(AS-PS)-(PL-PS) Angle between the line drawn from the anterior and posterior most point in the smaller segment and the horizontal reference line

AL-BL-PL Angle between the anterior and posterior most point and the intersection point of the lateral sulcus and the gingival groove in the larger segment

AS-BS-PS Angle between the anterior and posterior most point and the intersection point of the lateral sulcus and the gingival groove in the smaller segment

(BL-AL)-(BS-AS) Angle between the anterior most point and the intersection point of the lateral sulcus and the gingival groove of the larger and smaller segments
